# Supplementary material
Source: Springer Nature journal article supplement (https://www.springermedizin.de/resource/supplementary/12874_2012_864_MOESM5_ESM.pdf/9432676)

**Poisson, I**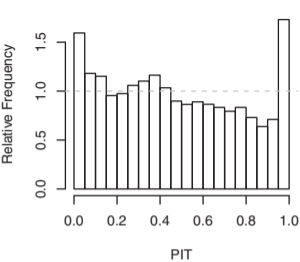**Poisson, IS**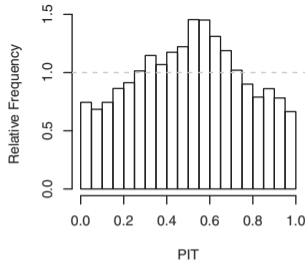**ZIP, I**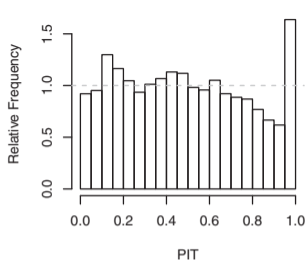**ZIP, IS**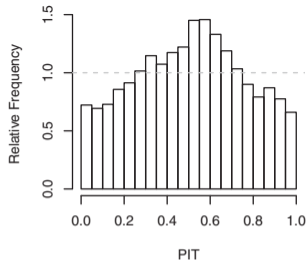**NB, I**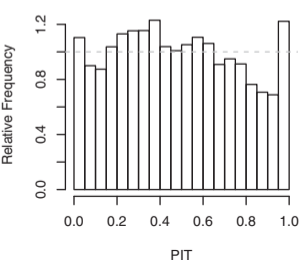**NB, IS**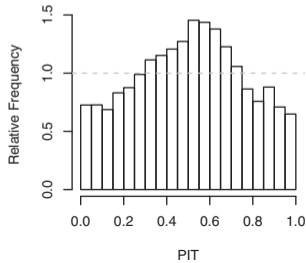**arcsinh LMM, I**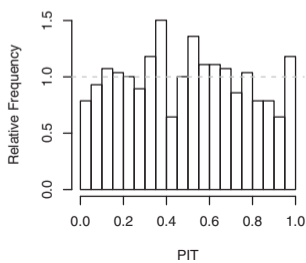**arcsinh LMM, IS**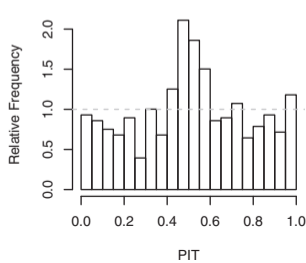

Supplement: MOESM5 [file 9432676]
